# Supplementary material for: Diagnostic performance of mycological tests for invasive pulmonary aspergillosis in non-haematological patients: protocol for a systematic review and meta-analysis
Source: HighWire-hosted journal article supplement (doi:10.1136/bmjopen-2021-057746), 2022-08-01
Supplement: bmjopen-2021-057746supp001_data_supplement.pdf [file bmjopen-2021-057746supp001_data_supplement.pdf]

## Supplement 1. Search strategy

### On Pubmed

- 1 “Aspergillus” [MeSH] OR “Aspergillosis” [MeSH] OR “Invasive Pulmonary Aspergillosis”[MeSH] OR aspergill\*[ tw] OR “Pulmonary Aspergillosis”[tw] OR “Invasive Pulmonary Aspergillosis”[tw]
- 2 “diagnosis”[MeSH] OR “diagnostic”[tw] OR “diagnosis”[tw]
- 3 "case-control studies" [mh] OR "Cohort Studies"[mh] OR "Longitudinal Studies"[mh] OR "retrospective studies" [mh] OR “prospective studies”[mh] OR OR "Registries"[mh] OR trial[tw] OR trials[tw] OR cohort\*[tw] OR case control\*[tw] longitudinal\*[tw] OR prospective\*[tw] OR retrospective\*[tw]
- 4 English[la]
- 5 #1 AND #2 AND #3 AND #4
- 6 humans[MeSH]
- 7 #5 AND #6
- 8 "2002/01/01"[Date - Publication] : "3000"[Date - Publication]
- 9 #7 AND #8

### On Embase and Central via Ovid platform

- 1 exp Aspergillus/ or exp Aspergillosis/ or exp Invasive Pulmonary Aspergillosis/ (Invasive Pulmonary Aspergillosis or Invasive Aspergillosis).ti,ab,tw.
- 2 exp diagnosis/
- 3 (diagnosis or diagnostic).ti,ab,tw.
- 4 exp case-control studies/ OR exp Cohort Studies/ OR exp Longitudinal Studies/ OR exp retrospective studies/ OR exp prospective studies/ OR exp Registries/
- 5 (trial or trials or cohort\* or longitudinal\* or prospective\* or retrospective\*).tw.
- 6 english.lg.
- 7 #2 OR #3
- 8 #4 OR #5
- 9 #1 AND #6 AND #7 AND #8
- 10 exp humans/
- 11 #9 and #10
- 12 limit 11 to yr="2002 -Current"
